# Supplementary material for: Effects of Resistance Training on Measures of Muscular Strength in People with Parkinson’s Disease: A Systematic Review and Meta-Analysis
Source: PubMed Central journal article supplement (PMC4492705; doi:10.1371/journal.pone.0132135), 2015-07-06
Supplement: pone.0132135.s002.pdf [file pone.0132135.s002.pdf]

## Search Strategy

### Database: Medline (via Ovid SP)

| Search term                                                                                                       |
|-------------------------------------------------------------------------------------------------------------------|
| 1 exp Parkinson's disease/                                                                                        |
| 2 Parkinson\$.ti. or Parkinson\$.ab.                                                                              |
| 3 #1 or #2                                                                                                        |
| 4 (resistance training or resistance exercise).mp. or resistance training/                                        |
| 5 (strength training or strength* exercise).mp. or strength training/                                             |
| 6 exercise.mp. or Exercise/                                                                                       |
| 7 exercise therapy.mp. or Exercise Therapy/                                                                       |
| 8 exercise tolerance.mp. or exercise tolerance/ or exercise test/                                                 |
| 9 (physiotherapy or physical therapy).mp.                                                                         |
| 10 rehabilitation.mp. or rehabilitation/                                                                          |
| 11 sports.mp. or sports/                                                                                          |
| 12 weight lifting.mp. or weight lifting/                                                                          |
| 13 isometric contraction/ or isotonic contraction.mp.                                                             |
| 14 ((training or conditioning) adj3 (intervention\$ or protocol\$ or program\$ or activit\$ or regim\$)).mp.      |
| 15 (exercise adj3 (train\$ or intervention\$ or protocol\$ or program\$ or therap\$ or activit\$ or regim\$)).mp. |
| 16 (muscle strengthening or progressive resist\$).mp.                                                             |
| 17 ((weight or strength\$ or resist\$) adj (train\$ or lift\$ or exercise\$)).mp.                                 |
| 18 ((isometric or isotonic or eccentric or concentric) adj (contraction\$ or exercise\$)).mp.                     |
| 19 or/4-18                                                                                                        |
| 20 randomized controlled trial.pt.                                                                                |
| 21 randomized controlled trials.mp. or Randomized Controlled Trial/                                               |
| 22 controlled clinical trial.pt.                                                                                  |
| 23 controlled clinical trials.mp. or controlled clinical trial/                                                   |
| 24 random allocation.mp. or Random Allocation/                                                                    |
| 25 single-blind method.mp. or Single-Blind Method/                                                                |
| 26 double-blind method.mp. or double-blind Method/                                                                |

27 clinical trial.pt.  
28 exp clinical trial/  
29 (clin\$ adj5 trial\$).mp.  
30 (single adj5 (blind\$ or mask\$)).mp.  
31 (double adj5 (blind\$ or mask\$)).mp.  
32 placebos.mp. or Placebos/  
33 placebo\$.mp. or Placebos/  
34 random\$.mp.  
35 research design.mp. or Research Design/  
36 multicenter study.pt.  
37 intervention studies.mp. or Intervention Studies/  
38 cross-over studies.mp. or Cross-Over Studies/  
39 control\$.tw.  
40 alternat\$ treatment.tw.  
41 Comparative Study/  
42 exp evaluation studies/  
43 follow-up studies.mp. or Follow-Up Studies/  
44 prospective studies.mp. or Prospective Studies/  
45 prospective.tw.  
46 counterbalance\$.tw.  
47 versus.tw.  
48 or/20-47  
49 #3 and #19 and #48

## Database: Cochrane Library (via Wiley Online)

|    | <b>Search term</b>                                                                                       |
|----|----------------------------------------------------------------------------------------------------------|
| 1  | [mh "Parkinson Disease"]                                                                                 |
| 2  | Parkinson*:ti or Parkinson*:ab                                                                           |
| 3  | #1 or #2                                                                                                 |
| 4  | resistance training:kw or resistance exercise:kw or [mh "resistance training"]                           |
| 5  | strength training:kw or strength* exercise:kw or [mh "strength training"]                                |
| 6  | exercise:kw or [mh Exercise]                                                                             |
| 7  | exercise therapy:kw or [mh "Exercise Therapy"]                                                           |
| 8  | exercise tolerance:kw or [mh "exercise tolerance"] or [mh "exercise test"]                               |
| 9  | (physiotherapy or physical therapy):kw                                                                   |
| 10 | rehabilitation:kw or [mh rehabilitation]                                                                 |
| 11 | sports:kw or [mh sports]                                                                                 |
| 12 | weight lifting:kw or [mh "weight lifting"]                                                               |
| 13 | [mh "isometric contraction"] or isotonic contraction:kw                                                  |
| 14 | ((training or conditioning) near/3 (intervention* or protocol* or program* or activit* or regim*)):kw    |
| 15 | (exercise near/3 (train* or intervention* or protocol* or program* or therap* or activit* or regim*)):kw |
| 16 | (muscle strengthening or progressive resist*):kw                                                         |
| 17 | ((weight or strength* or resist*) near (train* or lift* or exercise*)):kw                                |
| 18 | ((isometric or isotonic or eccentric or concentric) near (contraction* or exercise*)):kw                 |
| 19 | {or #4-#18}                                                                                              |
| 20 | "randomized controlled trial":pt                                                                         |
| 21 | "randomized controlled trials":kw or [mh "Randomized Controlled Trial"]                                  |
| 22 | "controlled clinical trial":pt                                                                           |
| 23 | controlled clinical trials:kw or [mh "controlled clinical trial"]                                        |
| 24 | random allocation:kw or [mh "Random Allocation"]                                                         |
| 25 | single-blind method:kw or [mh "Single-Blind Method"]                                                     |
| 26 | double-blind method:kw or [mh "double-blind Method"]                                                     |
| 27 | clinical trial:pt                                                                                        |
| 28 | [mh "clinical trial"]                                                                                    |

29 (clin\* near/5 trial\*):kw  
30 (single near/5 (blind\* or mask\*)):kw  
31 (double near/5 (blind\* or mask\*)):kw  
32 placebos:kw or [mh Placebos]  
33 placebo\*:kw or [mh Placebos]  
34 random\*:kw  
35 research design:kw or [mh "Research Design"]  
36 multicenter study:pt  
37 intervention studies:kw or [mh "Intervention Studies"]  
38 cross-over studies:kw or [mh "Cross-Over Studies"]  
39 control\*  
40 alternat\* treatment  
41 [mh "Comparative Study"]  
42 [mh "evaluation studies"]  
43 follow-up studies:kw or [mh "Follow-Up Studies"]  
44 prospective studies:kw or [mh "Prospective Studies"]  
45 prospective  
46 counterbalance\*  
47 versus  
48 {OR #20-#47}  
49 #3 and #19 and #48

## Database: CINAHL (via Ebscohost)

- Search term**
- 1 (MH "Parkinson Disease")
  - 2 TI Parkinson\* OR AB Parkinson\*
  - 3 S1 OR S2
  - 4 TX resistance training OR TX resistance exercise OR (MH "Muscle Strengthening+")
  - 5 TX strength\* training OR TX strength\* exercise OR (MH "Muscle Strengthening+")
  - 6 (MH "Exercise+") OR TX exercise
  - 7 (MH "Therapeutic Exercise+") OR TX exercise therapy
  - 8 (MH "Exercise Tolerance+") OR (MH "Exercise Test+") OR TX exercise tolerance
  - 9 (MH "Physical Therapy+") OR TX physical therapy OR TX physiotherapy
  - 10 (MH "Rehabilitation+") OR TX rehabilitation
  - 11 (MH "Sports+") OR TX sports
  - 12 (MH "Weight Lifting") OR TX weight lifting
  - 13 (MH "Isometric Contraction") OR (MH "Isotonic Contraction+") OR TX isotonic contraction  
OR TX isometric contraction
  - 14 TX ((training or conditioning) N3 (intervention\* or protocol\* or program\* or activit\* or  
regim\*))
  - 15 TX (exercise N3 (train\* or intervention\* or protocol\* or program\* or therap\* or activit\* or  
regim\*))
  - 16 TX muscle strengthening OR TX progressive resist\*
  - 17 TX (weight or strength\* or resist\*) N5 (train\* or lift\* or exercise\*)
  - 18 TX (isometric or isotonic or eccentric or concentric) N5 (contraction\* or exercise\*)
  - 19 S4 OR S5 OR S6 OR S7 OR S8 OR S9 OR S10 OR S11 OR S12 OR S13 OR S14 OR S15 OR S16  
OR S17 OR S18
  - 20 PT randomized controlled trial
  - 21 (MH "Randomized Controlled Trials") OR TX randomized controlled trials
  - 22 PT controlled clinical trial
  - 23 (MH "Clinical Trials+") OR TX controlled clinical trial
  - 24 (MH "Random Assignment") OR TX random allocation
  - 25 (MH "Single-Blind Studies") OR TX single-blind method
  - 26 (MH "Double-Blind Studies") OR TX double-blind method

- 27 PT clinical trial
- 28 TX clin\* N5 trial\*
- 29 TX single N5 (blind\* or mask\*)
- 30 TX double N5 (blind\* or mask\*)
- 31 (MH "Placebos") OR TX placebos
- 32 TX placebo\* OR (MH "Placebos")
- 33 TX random\*
- 34 (MH "Study Design+") OR TX research design
- 35 PT multicenter study
- 36 (MH "Experimental Studies+") OR TX intervention studies
- 37 (MH "Crossover Design") OR TX cross-over studies
- 38 TX control\*
- 39 TX alternat\* treatment
- 40 (MH "Comparative Studies")
- 41 (MH "Evaluation Research+")
- 42 (MH "Prospective Studies+") OR TX follow-up studies OR TX prospective studies
- 43 TX prospective
- 44 TX counterbalance\*
- 45 TX versus
- 46 S20 OR S21 OR S22 OR S23 OR S24 OR S25 OR S26 OR S27 OR S28 OR S29 OR S30 OR S31  
OR S32 OR S33 OR S34 OR S35 OR S36 OR S37 OR S38 OR S39 OR S40 OR S41 OR S42 OR  
S43 OR S44 OR S45
- 47 S3 AND S19 AND S46

## Database: Embase (via Elsevier)

|    | Search term                                                                                                                               |
|----|-------------------------------------------------------------------------------------------------------------------------------------------|
| 1  | 'parkinson disease'/exp AND [embase]/lim                                                                                                  |
| 2  | parkinson*:ab,ti AND [embase]/lim                                                                                                         |
| 3  | #3.1 OR #3.2                                                                                                                              |
| 4  | 'resistance training'/de OR 'resistance exercise'/de AND [embase]/lim                                                                     |
| 5  | 'strength training'/de OR 'strength exercise' AND [embase]/lim                                                                            |
| 6  | 'exercise'/de AND [embase]/lim                                                                                                            |
| 7  | 'exercise therapy'/de AND [embase]/lim                                                                                                    |
| 8  | 'exercise tolerance'/de OR 'exercise test'/de AND [embase]/lim                                                                            |
| 9  | 'physiotherapy'/de OR 'physical therapy'/de AND [embase]/lim                                                                              |
| 10 | 'rehabilitation'/de AND [embase]/lim                                                                                                      |
| 11 | 'sports'/de AND [embase]/lim                                                                                                              |
| 12 | 'weight lifting'/de AND [embase]/lim                                                                                                      |
| 13 | 'isometric contraction'/de OR 'isotonic contraction'/de AND [embase]/lim                                                                  |
| 14 | (training OR conditioning) NEAR/3 (intervention* OR protocol* OR program* OR activit* OR regim*) AND [embase]/lim                         |
| 15 | exercise NEAR/3 (train* OR intervention* OR protocol* OR program* OR therap* OR activit* OR regim*) AND [embase]/lim                      |
| 16 | 'muscle strengthening'/de OR 'muscle strengthening' OR progressive NEAR/3 resist* AND [embase]/lim                                        |
| 17 | (weight* OR strength* OR resist*) NEAR/3 (train* OR lift* OR exercise*) AND [embase]/lim                                                  |
| 18 | (isometric OR isotonic OR eccentric OR concentric) NEAR/3 (contraction* OR exercise*) AND [embase]/lim                                    |
| 19 | #19.1 OR #19.2 OR #19.3 OR #19.4 OR #19.5 OR #19.6 OR #19.7 OR #19.8 OR #19.9 OR #19.10 OR #19.11 OR #19.12 OR #19.13 OR #19.14 OR #19.15 |
| 20 | 'randomized controlled trial':it AND [embase]/lim                                                                                         |
| 21 | 'randomized controlled trials'/de OR 'randomized controlled trial'/de AND [embase]/lim                                                    |
| 22 | 'controlled clinical trial':it AND [embase]/lim                                                                                           |
| 23 | 'controlled clinical trials'/de OR 'controlled clinical trial'/de AND [embase]/lim                                                        |
| 24 | 'random allocation'/de AND [embase]/lim                                                                                                   |
| 25 | 'single-blind method'/de AND [embase]/lim                                                                                                 |

- 26 'double-blind method'/de AND [embase]/lim
- 27 'clinical trial':it AND [embase]/lim
- 28 'clinical trial'/exp AND [embase]/lim
- 29 clin\* NEAR/5 trial\* AND [embase]/lim
- 30 single NEAR/5 (blind\* OR mask\*) AND [embase]/lim
- 31 double NEAR/5 (blind\* OR mask\*) AND [embase]/lim
- 32 'placebos'/de AND [embase]/lim
- 33 placebo\* AND [embase]/lim
- 34 random\* AND [embase]/lim
- 35 'research design'/de AND [embase]/lim
- 36 'multicenter study':it AND [embase]/lim
- 37 'intervention studies'/de AND [embase]/lim
- 38 'cross-over studies'/de AND [embase]/lim
- 39 control\* AND [embase]/lim
- 40 alternat\* NEAR/3 treatment AND [embase]/lim
- 41 'comparative study'/de AND [embase]/lim
- 42 'evaluation studies'/de AND [embase]/lim
- 43 'follow-up studies'/de AND [embase]/lim
- 44 'prospective studies'/de AND [embase]/lim
- 45 prospective AND [embase]/lim
- 46 counterbalance\* AND [embase]/lim
- 47 versus AND [embase]/lim
- 48 #48.1 OR #48.2 OR #48.3 OR #48.4 OR #48.5 OR #48.6 OR #48.7 OR #48.8 OR #48.9 OR  
#48.10 OR #48.11 OR #48.12 OR #48.13 OR #48.14 OR #48.15 OR #48.16 OR #48.17 OR  
#48.18 OR #48.19 OR #48.20 OR #48.21 OR #48.22 OR #48.23 OR #48.24 OR #48.25 OR  
#48.26 OR #48.27 OR #48.28
- 49 #49.3 AND #49.19 AND #49.48



## Database: SPORTDiscus (via Ebscohost)

|    | Search term                                                                                          |
|----|------------------------------------------------------------------------------------------------------|
| 1  | TX parkinson's disease                                                                               |
| 2  | TI parkinson* OR AB parkinson*                                                                       |
| 3  | S1 OR S2                                                                                             |
| 4  | TX resistance training OR TX resistance exercise                                                     |
| 5  | TX strength training OR TX strength* exercise                                                        |
| 6  | TX exercise OR SU exercise OR KW exercise                                                            |
| 7  | TX exercise therapy OR SU exercise therapy OR KW exercise therapy                                    |
| 8  | TX exercise tolerance OR TX exercise test                                                            |
| 9  | TX physiotherapy OR TX physical therapy                                                              |
| 10 | TX rehabilitation                                                                                    |
| 11 | TX sports                                                                                            |
| 12 | TX weight lifting                                                                                    |
| 13 | TX isometric contraction OR TX isotonic contraction                                                  |
| 14 | TX ((training or conditioning) N3 (intervention* or protocol* or program* or activit* or regim*))    |
| 15 | TX (exercise N3 (train* or intervention* or protocol* or program* or therap* or activit* or regim*)) |
| 16 | TX muscle strengthening OR TX progressive resist*                                                    |
| 17 | TX (weight or strength* or resist*) N5 (train* or lift* or exercise*)                                |
| 18 | TX (isometric or isotonic or eccentric or concentric) N5 (contraction* or exercise*)                 |
| 19 | S4 OR S5 OR S6 OR S7 OR S8 OR S9 OR S10 OR S11 OR S12 OR S13 OR S14 OR S15 OR S16<br>OR S17 OR S18   |
| 20 | TX randomized controlled trial OR TX randomized controlled trials                                    |
| 21 | TX controlled clinical trial OR TX controlled clinical trials                                        |
| 22 | TX random allocation OR TX random assignment                                                         |
| 23 | TX single-blind method OR TX single-blind study                                                      |
| 24 | TX double-blind method OR TX double-blind study                                                      |
| 25 | TX clinical trial OR TX clinical trials                                                              |
| 26 | TX clin* N5 trial*                                                                                   |
| 27 | TX single N5 (blind* or mask*)                                                                       |

- 28 TX double N5 (blind\* or mask\*)
- 29 TX placebos OR TX placebo\*
- 30 TX random\*
- 31 TX research design OR TX study design
- 32 TX multicenter study
- 33 TX interventions OR TX intervention study OR TX intervention studies OR TX intervention
- 34 TX cross-over studies OR TX crossover trials OR TX crossover design OR TX crossover  
studies OR cross-over trials OR cross-over design
- 35 TX control\*
- 36 TX alternat\* treatment
- 37 TX comparative studies OR TX comparative study
- 38 TX evaluation methodology OR TX evaluation studies OR TX evaluation research
- 39 TX follow-up studies OR TX follow-up study
- 40 TX prospective studies OR TX prospective study
- 41 TX prospective
- 42 TX counterbalance\*
- 43 TX versus
- 44 S20 OR S21 OR S22 OR S23 OR S24 OR S25 OR S26 OR S27 OR S28 OR S29 OR S30 OR S31  
OR S32 OR S33 OR S34 OR S35 OR S36 OR S37 OR S38 OR S39 OR S40 OR S41 OR S42 OR  
S43
- 45 S3 AND S19 AND S44
